# Supplementary material for: Parametric Investigation of an Injection-Jet Self-Powered Fontan Circulation
Source: Research Square preprint supplement (doi:10.21203/rs.3.rs-825168/v1), 2021-09-16
Supplement: Supplementary file 1 [file 652a58348d2388c8680b2e77.docx]

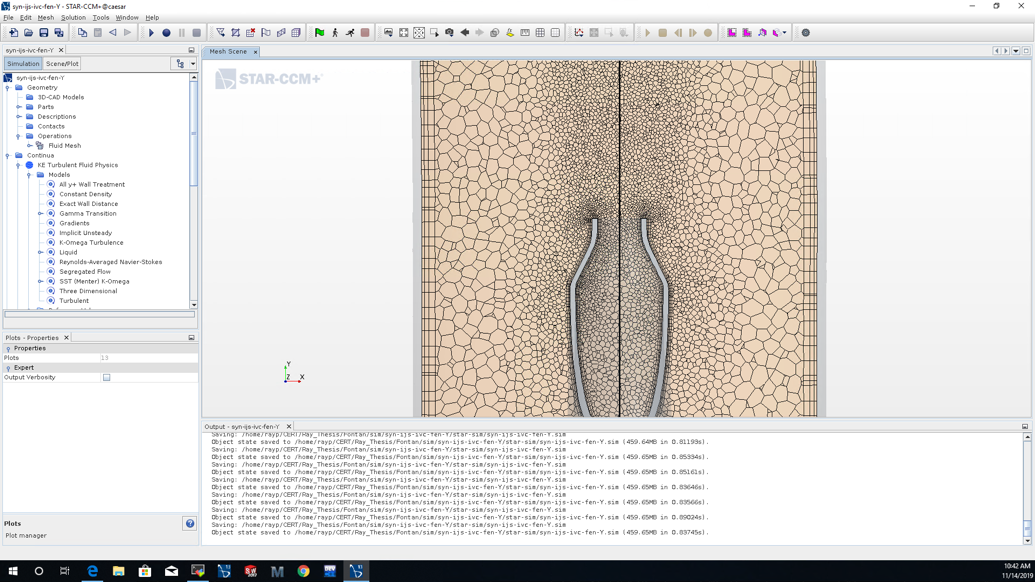

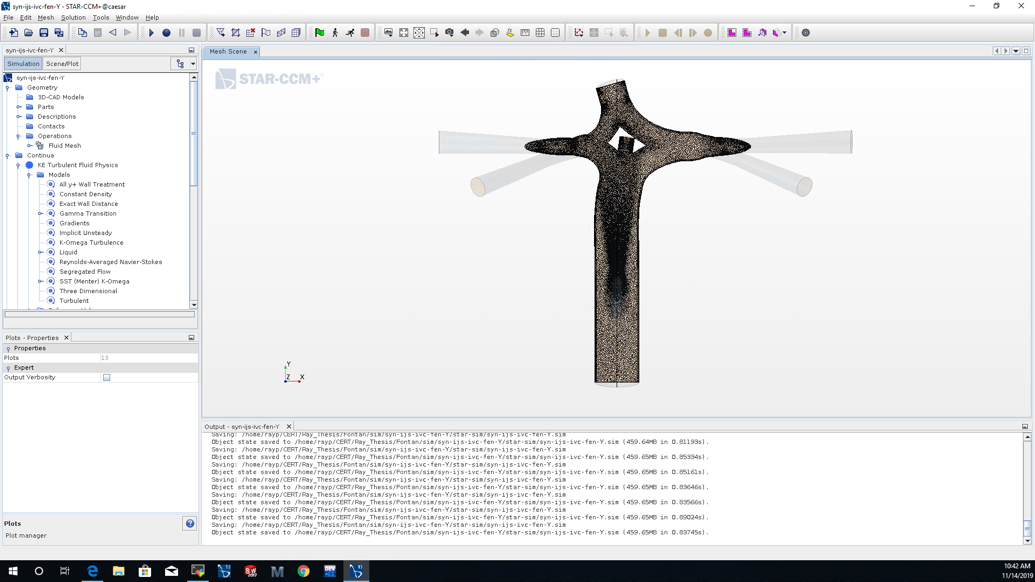

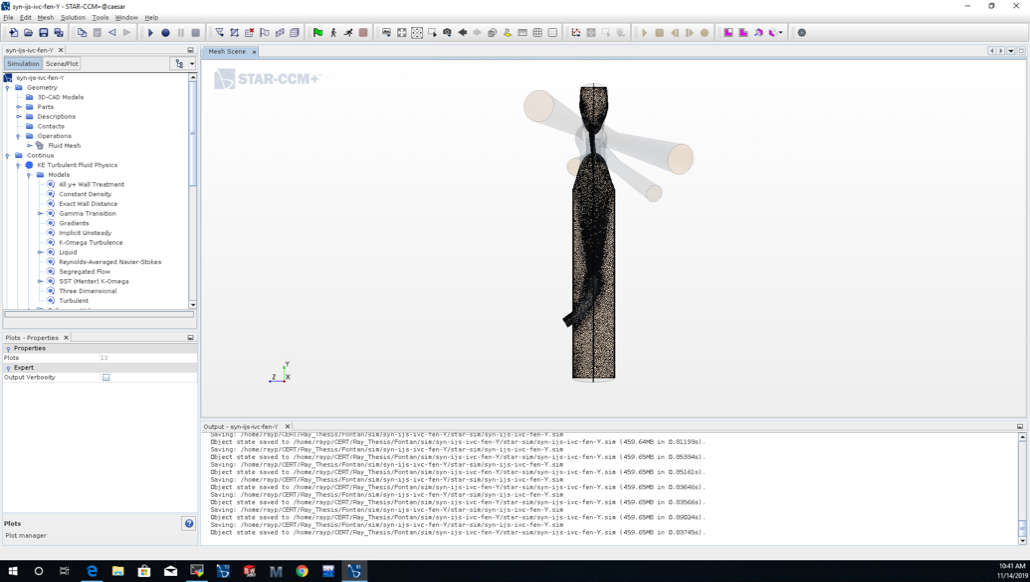


A

B

Supplementary Figure S1 - Volume mesh refinement based on shunt surface and shunt mouth wake ((A) front and side full domain view and (B) close-up to IJS outlet).


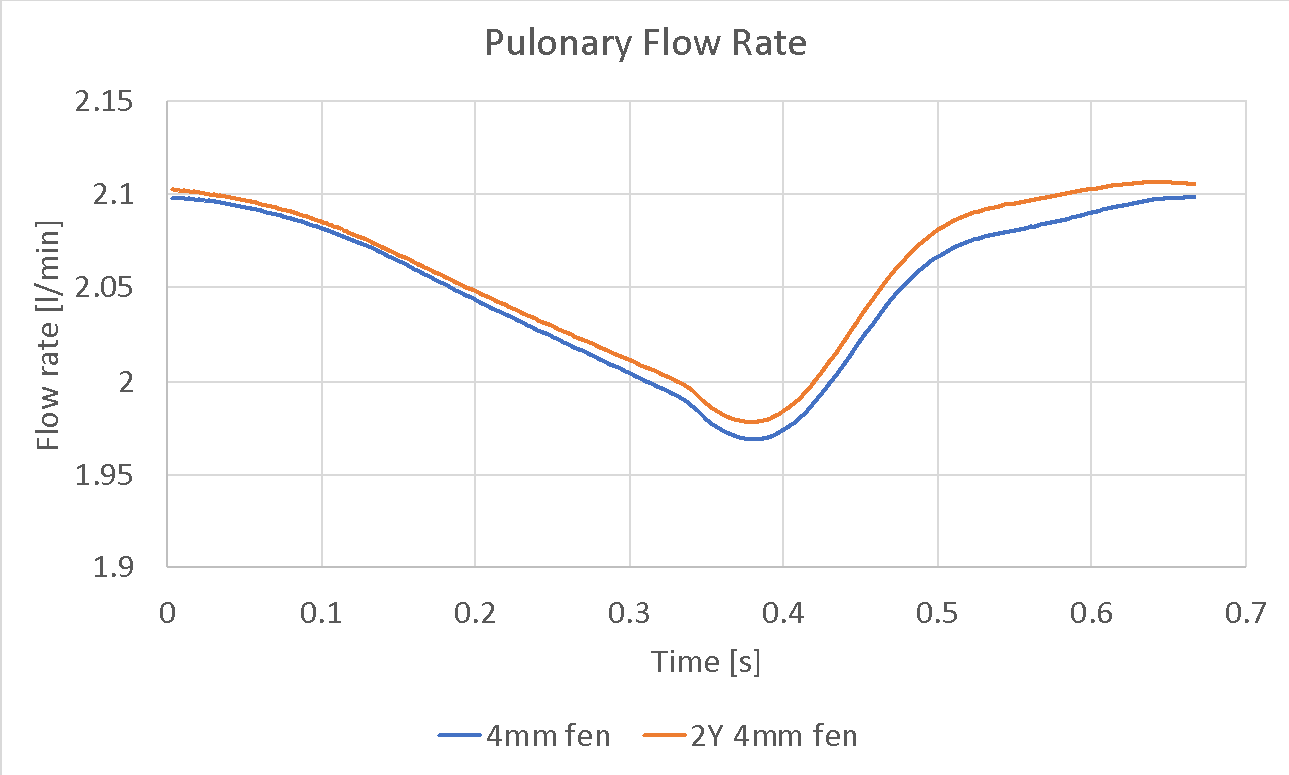

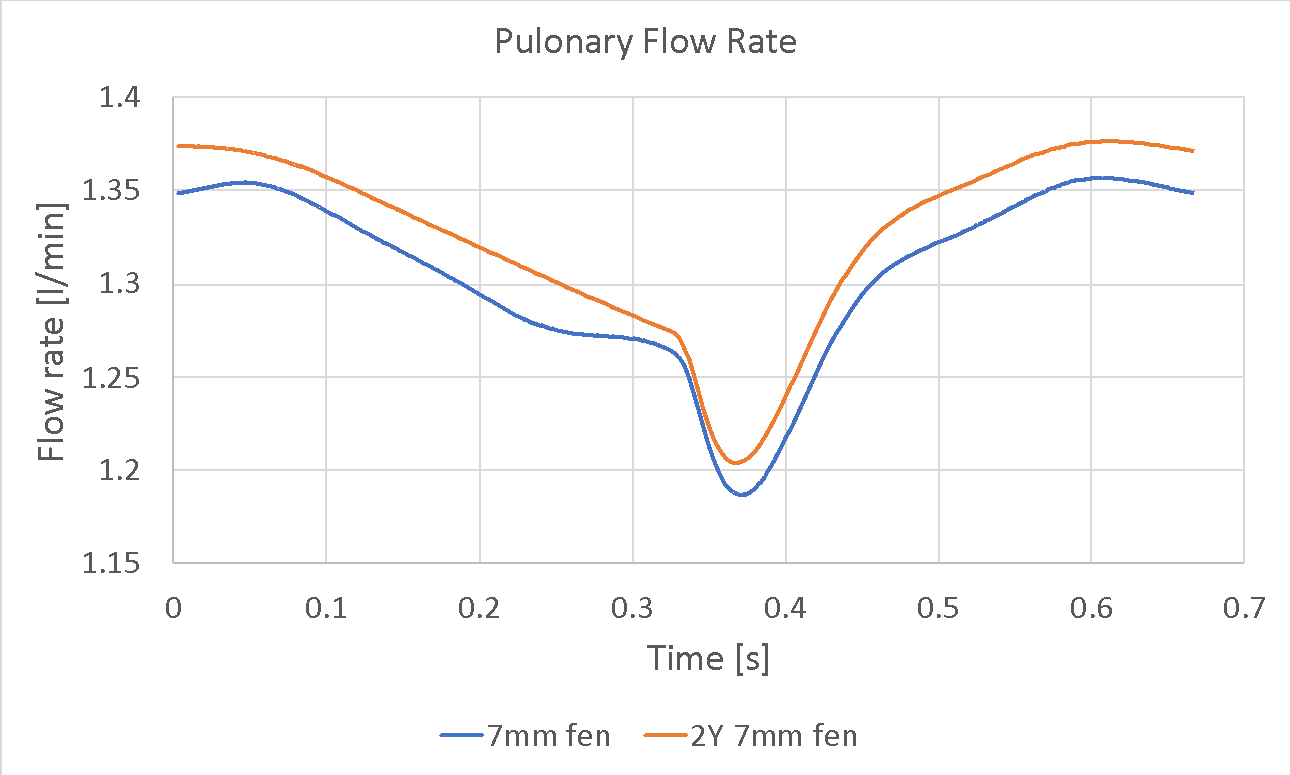


A

B

Supplementary Figure S2 - Qp for a set of fenestrated Fontan models with a standard (baseline) connection and a double Y-graft anatomic variant for (A) a 4mm fenestration and (B) a 7mm fenestration.
